# Supplementary material
Source: PubMed Central journal article supplement (PMC7300591)
Supplement: MJA2-212-497-s001.pdf [file MJA2-212-497-s001.pdf]

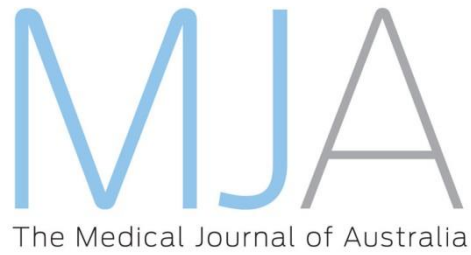

## **Supporting Information**

### **Supplementary table**

**This appendix was part of the submitted manuscript and has been peer reviewed.  
It is posted as supplied by the authors.**

Appendix to: Lin RJ, Lee TH, Lye DCB. From SARS to COVID-19: the Singapore journey. *Med J Aust* 2020; doi: 10.5694/mja2.50623.

**Definitions for suspected cases of coronavirus disease 2019 (COVID-19) — Singapore, January 2–April 16, 2020**

| Date              | Suspect case definition                                                                                                                                                                                                                                                                                                                                                                                                                                                                                                                                                                                                                                                                 |
|-------------------|-----------------------------------------------------------------------------------------------------------------------------------------------------------------------------------------------------------------------------------------------------------------------------------------------------------------------------------------------------------------------------------------------------------------------------------------------------------------------------------------------------------------------------------------------------------------------------------------------------------------------------------------------------------------------------------------|
| January 2, 2020   | (a) Clinical signs and symptoms suggestive of pneumonia or severe respiratory infection with breathlessness AND travel to or residence in Wuhan city, China, within the last 14 days; OR<br>(b) An acute respiratory illness of any degree of severity in a person who, within 14 days before onset of illness, had close contact* with a patient with pneumonia of unknown etiology linked to the Wuhan cluster.                                                                                                                                                                                                                                                                       |
| January 21, 2020  | (a) Clinical signs and symptoms suggestive of pneumonia or severe respiratory infection with breathlessness AND travel to mainland China within 14 days before onset of illness; OR<br>(b) An acute respiratory illness of any degree of severity in a person who, within 14 days before onset of illness, had been to a hospital in mainland China or had close contact* with a patient with COVID-19.                                                                                                                                                                                                                                                                                 |
| January 25, 2020  | (a) Clinical signs and symptoms suggestive of pneumonia or severe respiratory infection with breathlessness AND travel to mainland China within 14 days before onset of illness; OR<br>(b) An acute respiratory illness of any degree of severity in a person who, within 14 days before onset of illness, had:<br>i. Been to Wuhan city or Hubei Province, China; OR<br>ii. Been to a hospital in mainland China; OR<br>iii. Had close contact* with a patient with COVID-19.                                                                                                                                                                                                          |
| February 4, 2020  | (a) Clinical signs and symptoms suggestive of pneumonia or severe respiratory infection with breathlessness AND travel to mainland China within 14 days before onset of illness; OR<br>(b) An acute respiratory illness of any degree of severity in a person who, within 14 days before onset of illness, had:<br>i. Been to Hubei Province (including Wuhan city) or Zhejiang Province (including Hangzhou city), China; OR<br>ii. Been to a hospital in mainland China; OR<br>iii. Had close contact* with a person with COVID-19; OR<br>iv. Had frequent or close contact during work <sup>†</sup> with recent travellers from mainland China (travel history in the last 14 days). |
| February 23, 2020 | (a) Clinical signs and symptoms suggestive of pneumonia or severe respiratory infection with breathlessness AND within 14 days before onset of illness in a person who had:<br>i. Been to mainland China; OR<br>ii. Been to Daegu City or Cheongdo County, South Korea; OR<br>(b) An acute respiratory illness of any degree of severity in a person who, within 14 days before onset of illness, had:<br>i. Been to Hubei Province (including Wuhan city) or Zhejiang Province (including Hangzhou city), China; OR<br>ii. Been to a hospital in mainland China; OR<br>iii. Had close contact* with a patient with COVID-19                                                            |
| March 3, 2020     | (a) Clinical signs and symptoms suggestive of pneumonia or severe respiratory infection with breathlessness AND within 14 days before onset of illness in a person who had been to mainland China OR South Korea OR Japan OR Northern Italy <sup>§</sup> OR Iran; OR<br>(b) An acute respiratory illness of any degree of severity in a person who, within 14 days before onset of illness, had:<br>i. Been to Hubei Province (including Wuhan city), China; Daegu city or Cheongdo County, South Korea; OR<br>ii. Been to a hospital in mainland China OR South Korea OR Japan OR Northern Italy <sup>§</sup> OR Iran; OR<br>iii. Had close contact* with a patient with COVID-19.     |
| March 9, 2020     | (a) Clinical signs and symptoms suggestive of pneumonia or severe respiratory infection with breathlessness AND who within 14 days before onset of illness had travelled abroad (i.e. to any country outside of Singapore).                                                                                                                                                                                                                                                                                                                                                                                                                                                             |

|                |                                                                                                                                                                                                                                                                                                                                                                                                                                                                                                                                                                                                                                                                                                    |
|----------------|----------------------------------------------------------------------------------------------------------------------------------------------------------------------------------------------------------------------------------------------------------------------------------------------------------------------------------------------------------------------------------------------------------------------------------------------------------------------------------------------------------------------------------------------------------------------------------------------------------------------------------------------------------------------------------------------------|
|                | <p>(b) A person with an acute respiratory illness of any degree of severity who, within 14 days before onset of illness had:</p> <p>i. Been to Mainland China, Republic of Korea, Italy, Iran, France, Germany, Spain, Japan, the United Kingdom; OR</p> <p>ii. Been to any hospital abroad; OR</p> <p>iii. Had close contact* with a case of COVID-19 infection</p>                                                                                                                                                                                                                                                                                                                               |
| March 19, 2020 | <p>(a) A person with clinical signs and symptoms suggestive of pneumonia or severe respiratory infection with breathlessness AND who within 14 days before onset of illness had travelled abroad (i.e. to any country outside of Singapore).</p> <p>(b) A person with an acute respiratory illness of any degree of severity who, within 14 days before onset of illness had:</p> <p>i. Been to Mainland China, Republic of Korea, Japan, Indonesia, Philippines, Thailand, Italy, Switzerland, France, Germany, Spain, the United Kingdom, the United States of America, Iran; OR</p> <p>ii. Been to any hospital abroad; OR</p> <p>iii. Had close contact* with a case of COVID-19 infection</p> |
| April 15, 2020 | <p>(a) A person with clinical signs and symptoms suggestive of pneumonia or severe respiratory infection with breathlessness.</p> <p>(b) A person with an acute respiratory illness of any degree of severity (e.g. symptoms of cough, sore-throat, runny nose, anosmia), with or without fever, who, within 14 days before onset of illness had:</p> <p>(i) Travelled abroad (outside Singapore); OR</p> <p>(ii) Close contact* with a case of COVID-19 infection OR</p> <p>(iii) Stayed in a foreign worker dormitory</p>                                                                                                                                                                        |
| April 16, 2020 | <p>(a) A person with clinical signs and symptoms suggestive of Community Acquired Pneumonia or community-acquired severe respiratory infection with breathlessness.</p> <p>(b) A person with an acute respiratory illness of any degree of severity (e.g. symptoms of cough, sore throat, runny nose, anosmia), with or without fever, who, within 14 days before onset of illness had:</p> <p>(i) Travelled abroad (outside Singapore); OR</p> <p>(ii) Close contact* with a case of COVID-19 infection OR</p> <p>(iii) Stayed in a foreign worker dormitory</p>                                                                                                                                  |

\* Close contact is defined as having close (within 2 m [6.6 ft]) and prolonged interaction (30 mins or more) with the COVID-19 patient. Examples include household members or health care workers providing patient care. Lower-risk contacts are other persons who had non-transient interactions with the COVID-19 patient for a short period of time. An example includes check-in staff at hotel front desks.

† Persons who attended business meetings/discussions, frontline staff in hospitality and tourism (e.g. hotels, shops, or tours) with regular dealings with travellers from mainland China.

§ Northern Italy refers to eight administrative regions in Northern Italy: Aosta Valley, Piedmont, Liguria, Lombardy, Emilia-Romagna, Veneto, Friuli-Venezia Giulia, and Trentino-Alto Adige/Südtirol.
